# Supplementary material for: Suppression of IGF-I signals in neural stem cells enhances neurogenesis and olfactory function during aging
Source: PubMed Central journal article supplement (PMC4568972; doi:10.1111/acel.12365), 2015-07-29
Supplement: acel0014-0847-sd1.pdf [file acel0014-0847-sd1.pdf]

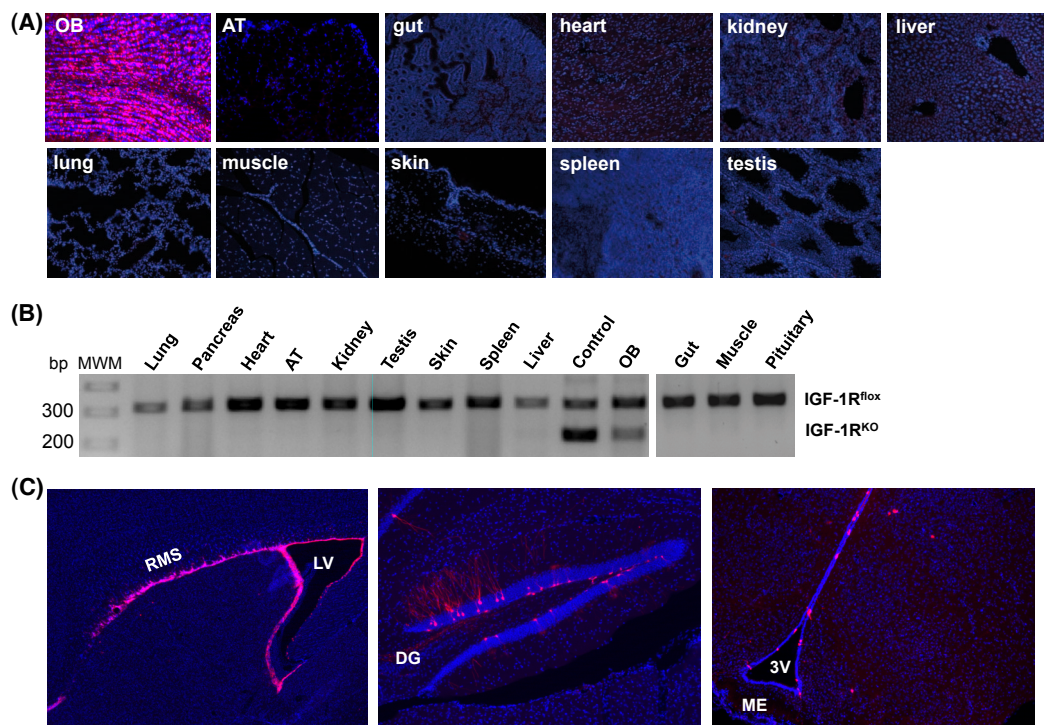

Figure S1

Chaker *et al.*

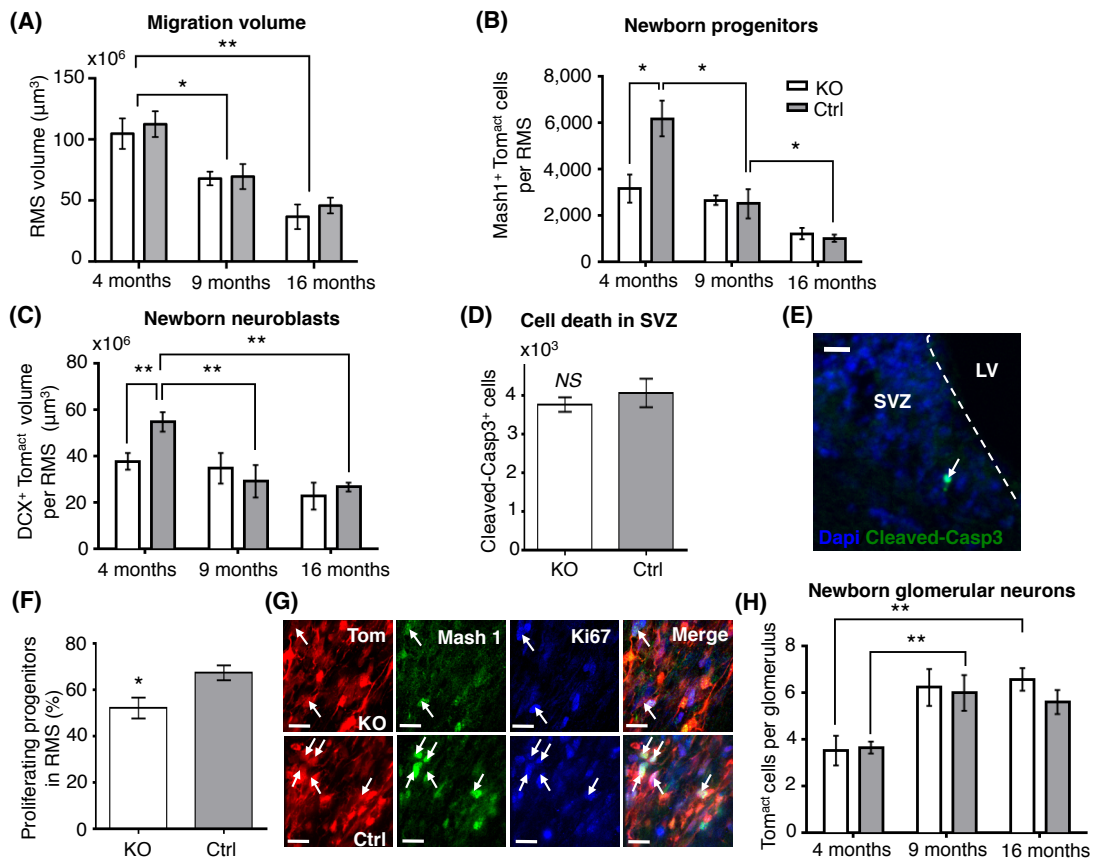

Figure S2

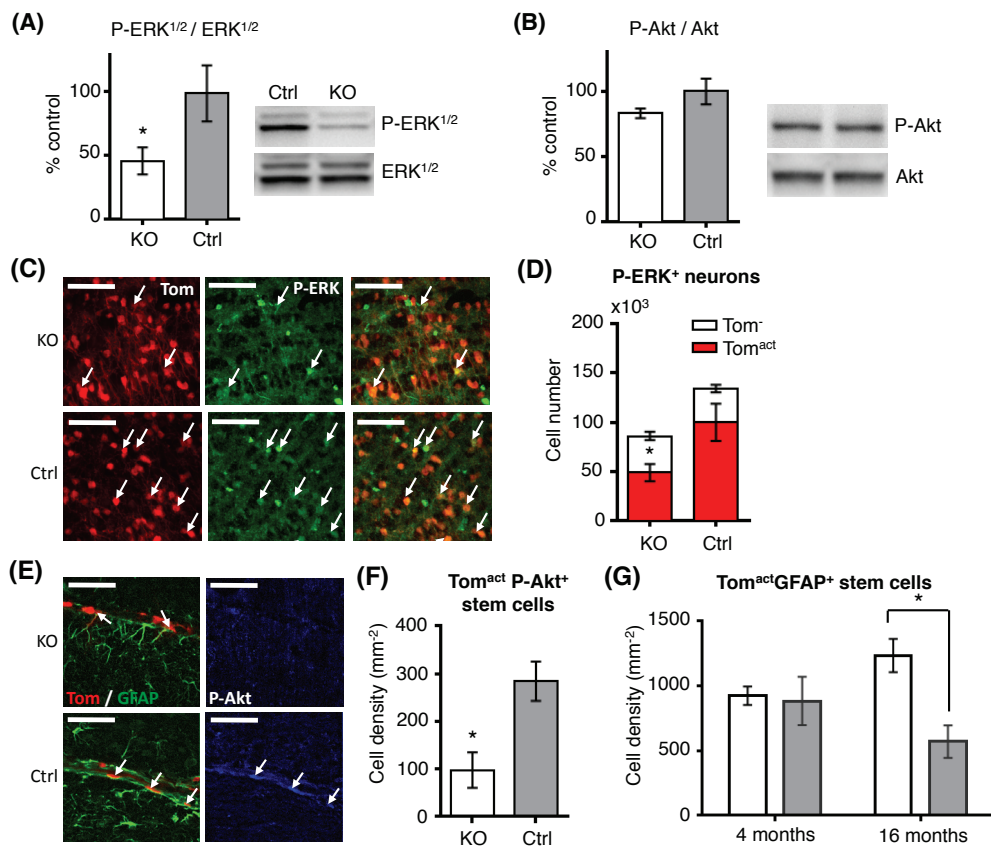

Figure S3

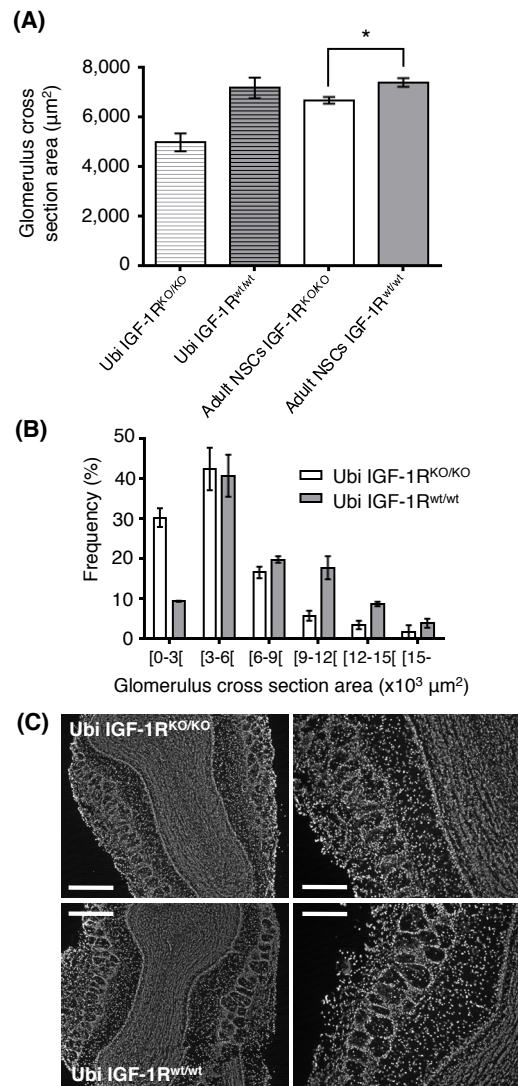

Figure S4

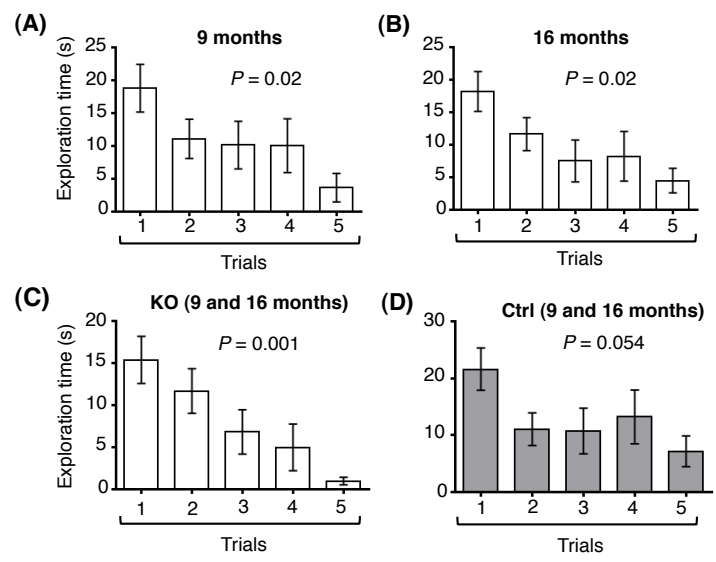

Figure S5

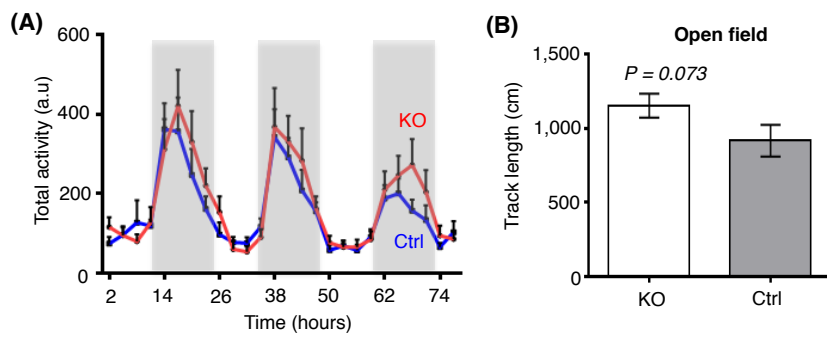

Figure S6

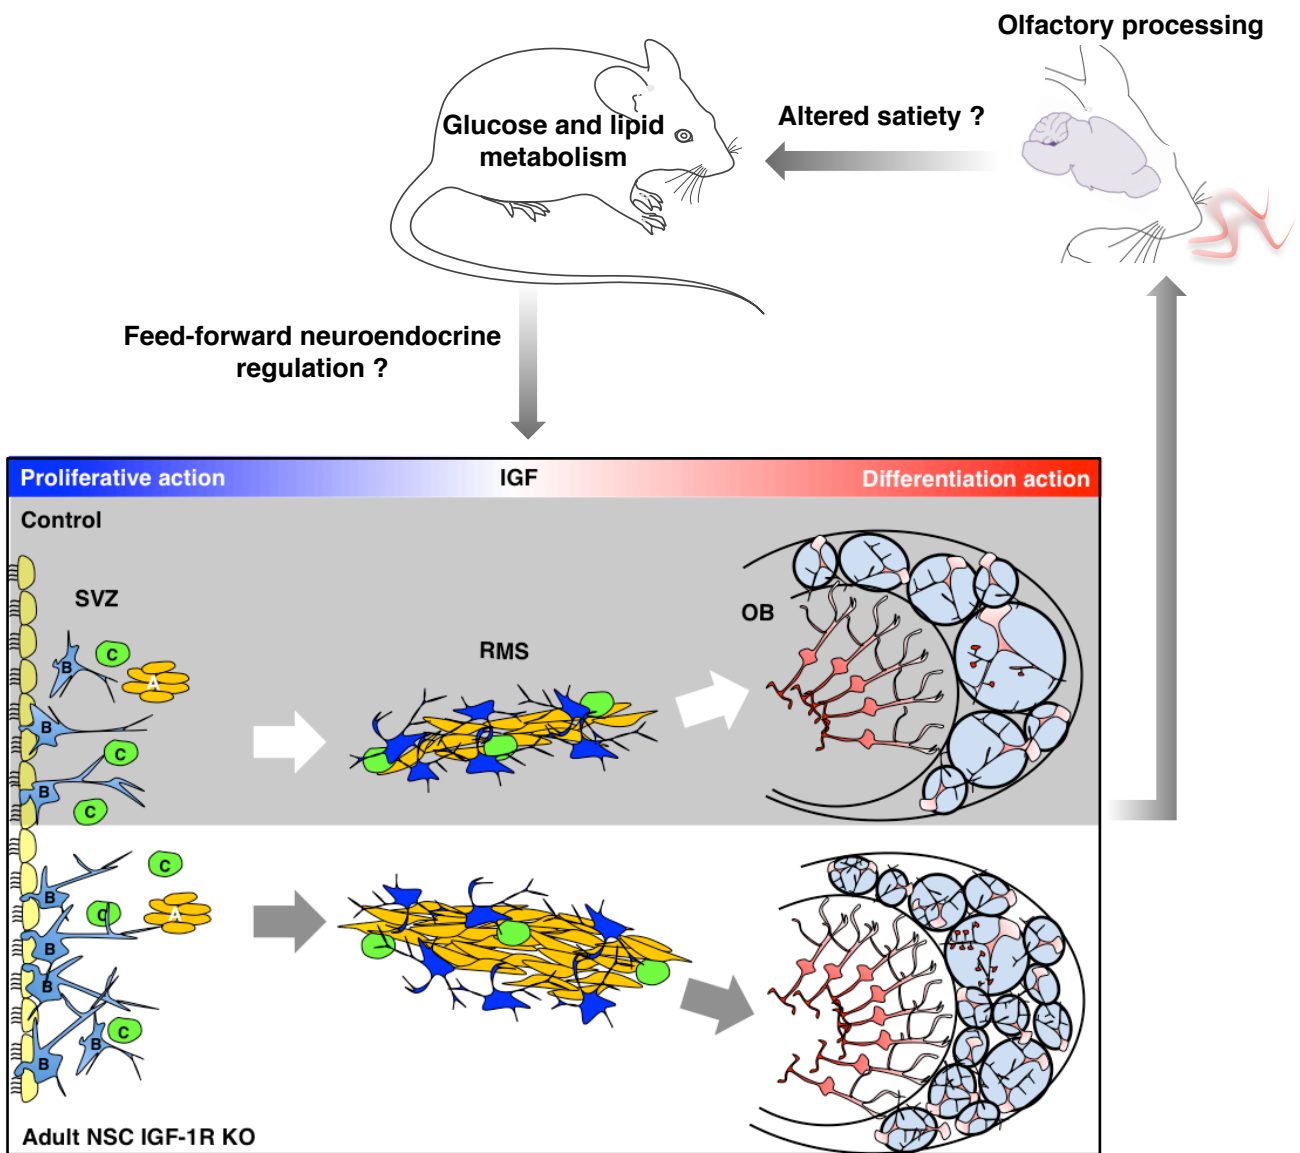

Figure S7
